# Supplementary material for: The Effect of Dietary Supplementation with Probiotic and Postbiotic Yeast Products on Ewes Milk Performance and Immune Oxidative Status
Source: MDPI journal article supplement (doi:10.3390/jof9121139), 2023-11-25
Supplement: s1 [file s1]

# **The Effect of Dietary Supplementation with Blend of Probiotic & Postbiotic Yeast Products on Dairy Ewes Milk Performance and Immune-Oxidative Status during the Peripartum Period**

**Christos Christodoulou<sup>1</sup>, Alexis Skourtis<sup>1</sup>, Panagiota Kyriakaki<sup>1</sup>, Fotis Fokion Satolias<sup>1</sup>, Dimitris Karabinas<sup>1</sup>, Maxime Briche<sup>2</sup>, Nizar Salah<sup>2</sup>, George Zervas<sup>1</sup>, Alexandros Mavrommatis<sup>1</sup>, Eleni Tsiplakou<sup>1,\*</sup>**

<sup>1</sup> Laboratory of Nutritional Physiology and Feeding, Department of Animal Science, School of Animal Biosciences, Agricultural University of Athens, Iera Odos 75, GR-11855 Athens, Greece

<sup>2</sup> Phileo by Lesaffre, Marcq en Baroeul, 59700 Nord, France

\* Correspondence: eltsiplakou@aua.gr

**Table S1.** Sequences, amplicon size, and annealing temperature of the primers designed to be specific for *Ovis Aries* and were used in real-time qPCR.

| Gene          | Acc. No.     | bp  | Tm °C | Forward primer 5'-3'      | Reverse primer 5'-3'    |
|---------------|--------------|-----|-------|---------------------------|-------------------------|
| <i>CCL5</i>   | XM_027975305 | 61  | 61    | CAAGTGCTCCATGGCAGCAG      | GTTGGCGCACACCTGACG      |
| <i>CXCL16</i> | XM_015098600 | 70  | 60    | GTGCCTGTGTTGTCCCTCTT      | GCTTGCACACCACGTAGAGT    |
| <i>IL1B</i>   | NM_001009465 | 70  | 60    | TGGATAGCCCATGTGTGCTG      | CAGAACACCACTTCTCGGCT    |
| <i>IL2</i>    | NM_001009806 | 70  | 60    | AAATCCCGAGAACCTCAAGCT     | TGTAGCGTTAACCTTGGGCA    |
| <i>IL6</i>    | NM_001009392 | 61  | 60    | CAGCAAGGAGACACTGGCAGA     | TCCATCTTTTTCCTCCATTTTGG |
| <i>IL8</i>    | NM_001009401 | 71  | 60    | CCTGCTCTCTGCAGCTCTGTG     | TGCATTGGCATCGAAGTTCTG   |
| <i>IL10</i>   | NM_001009327 | 100 | 60    | CTGGGGGAGAAGCTGAAGAC      | CTCTCTTCACCTGCTCCACC    |
| <i>IFNG</i>   | NM_001009803 | 146 | 60    | AAATCCGGTGGATGATCTG       | ACCATTACATTGATGCTCTCC   |
| <i>TNFA</i>   | NM_001024860 | 70  | 60    | GGGAGACACAACTAAGGGCT      | AACCTGCAGTTCAGCTCCG     |
| <i>NFKB</i>   | XM_042251202 | 70  | 60    | AAGCTGTGGTGGAGGACTTG      | ACAGAGTTACCCAAGCGGTC    |
| <i>GAPDH</i>  | NM_001190390 | 75  | 62    | AAAGGCCATCACCATCTTCCA     | ACCACGTACTCAGCACCAGCAT  |
| <i>YWHAZ</i>  | NM_001267887 | 70  | 62    | TGTTCTATTGTGCCTAGTACACTGT | CATCAAGACTCACTGCCTCCC   |

**Table S2.** Body weight (BW) of the Chios and Lacaune ewes of the three dietary treatments (CON, AC, ACMAN) throughout the experimental period (Before parturition, after parturition, and final day of the experiment).

| Dietary Treatments (D) |      |      |       |     | Time (T)          |                   |                   |     | Effect |        |      |
|------------------------|------|------|-------|-----|-------------------|-------------------|-------------------|-----|--------|--------|------|
| Chios                  |      |      |       |     |                   |                   |                   |     |        |        |      |
|                        | CON  | AC   | ACMAN | SEM | Pre.              | Post.             | End               | SEM | D      | S      | D×S  |
| BW,<br>kg              | 67.1 | 66.5 | 72.2  | 1.1 | 69.4 <sup>B</sup> | 66.4 <sup>C</sup> | 70.2 <sup>A</sup> | 1.4 | 0.39   | <0.001 | 0.03 |
| Lacaune                |      |      |       |     |                   |                   |                   |     |        |        |      |
|                        | CON  | AC   | ACMAN | SEM | Pre.              | Post.             | End               | SEM | D      | S      | D×S  |
| BW,<br>kg              | 67.1 | 66.5 | 72.2  | 3.4 | 78.5 <sup>B</sup> | 75.1 <sup>C</sup> | 79.1 <sup>A</sup> | 2.0 | 0.14   | <0.001 | 0.17 |

Means with different superscripts (A, B, C) between sampling times differ significantly ( $P < 0.05$ ).

SEM: Standard error of the mean.

Effect: The dietary treatment (D), measurement time (T), and the interaction between dietary treatment × time (D × T).

A significance level below 0.05 indicates a significant difference.

**Table S3.** Body weight (BW) of the ewes of the three dietary treatments (CON, AC, and ACMAN) throughout the experimental period (start of the experiment (P), at lambing (L), and the end (E) of the experiment).

|         | Dietary Treatments (D) |                   |                   |                  | Sampling Time (S) |                   |                   |                  |       | Effect <sup>b</sup> |       |       |       |       |
|---------|------------------------|-------------------|-------------------|------------------|-------------------|-------------------|-------------------|------------------|-------|---------------------|-------|-------|-------|-------|
|         | CON                    | AC                | ACMAN             | SEM <sup>a</sup> | P                 | L                 | E                 | SEM <sup>a</sup> | D     | S                   | D×S   | B     | B×S   | B×S×D |
| BW (kg) | 71.7                   | 69.9 <sup>t</sup> | 77.4 <sup>t</sup> | 0.900            | 73.8 <sup>B</sup> | 70.6 <sup>C</sup> | 74.5 <sup>A</sup> | 1.400            | 0.090 | <0.001              | 0.010 | 0.002 | 0.438 | 0.507 |

Means with different superscripts (A, B, C) between sampling times differ significantly at  $P < 0.05$  and  $t$  is referred to values between 0.05 and 0.100 ( $0.05 < t < 0.100$ )

<sup>a</sup>SEM: Standard error of the mean.

<sup>b</sup>Effect: The dietary treatment (D), the breed (B), the sampling time (S), and the interaction between dietary treatment x time (D x S) breed and sampling time (B x S) and dietary treatment, breed, and sampling time (D x B x S). CON: control dietary treatment; AC: dietary treatment supplemented with ActiSaf<sup>®</sup> and inorganic selenium; ACMAN: dietary treatment supplemented with ActiSaf<sup>®</sup>, Safmannan<sup>®</sup>, and SelSaf<sup>®</sup>.

**Table S4.** The  $\beta$ -hydroxybutyric acid (B-HBA) in Chios and Lacaune ewes' blood prepartum and postpartum from ewes of the three dietary treatments (CON, AC, ACMAN) in 1 - 3 weeks prepartum, and 1 - 3 weeks postpartum.

|                  | Dietary Treatment (D) |                   |                   |      | Sampling Time (S) |                   |      | Effect |        |       |
|------------------|-----------------------|-------------------|-------------------|------|-------------------|-------------------|------|--------|--------|-------|
|                  | Chios                 |                   |                   |      |                   |                   |      |        |        |       |
|                  | CON                   | AC                | ACMAN             | SEM  | 1 <sup>st</sup>   | 2 <sup>nd</sup>   | SEM  | D      | S      | D×S   |
| B-HBA,<br>mmol/L | 0.77 <sup>a</sup>     | 0.56 <sup>b</sup> | 0.53 <sup>b</sup> | 0.04 | 0.71 <sup>B</sup> | 0.53 <sup>A</sup> | 0.04 | 0.005  | <0.001 | 0.447 |
|                  | Lacaune               |                   |                   |      |                   |                   |      |        |        |       |

|                  | CON               | AC                | ACMAN             | SEM  | 1 <sup>st</sup>   | 2 <sup>nd</sup>   | SEM  | D     | S     | D×S   |
|------------------|-------------------|-------------------|-------------------|------|-------------------|-------------------|------|-------|-------|-------|
| B-HBA,<br>mmol/L | 0.76 <sup>a</sup> | 0.49 <sup>b</sup> | 0.50 <sup>b</sup> | 0.07 | 0.68 <sup>A</sup> | 0.49 <sup>B</sup> | 0.05 | 0.007 | 0.006 | 0.477 |

Means with different superscript (a, b) between dietary treatments and (A, B) between sampling times differ significantly ( $P < 0.05$ ).

SEM: Standard error of the mean.

Effect: The dietary treatment (D), sampling time (S), and the interaction between dietary treatment x time (D x S).

A significance level below 0.05 indicates a significant difference.

**Table S5.** Blood  $\beta$ -hydroxybutyric acid (B-HBA) in ewes of the three dietary treatments (CON, AC, and ACMAN) in 1 - 3 weeks prepartum and 1 - 3 weeks postpartum.

|                | Dietary Treatment (D) |                   |                   |       | Sampling Time (S) |                   |       | Effect <sup>b</sup> |        |       |       |       |       |
|----------------|-----------------------|-------------------|-------------------|-------|-------------------|-------------------|-------|---------------------|--------|-------|-------|-------|-------|
|                | CON                   | AC                | ACMAN             | SEM   | 1 <sup>st</sup>   | 2 <sup>nd</sup>   | SEM   | D                   | S      | D×S   | B     | B×S   | B×S×D |
| B-HBA (mmol/L) | 0.76 <sup>a</sup>     | 0.53 <sup>b</sup> | 0.51 <sup>b</sup> | 0.020 | 0.69 <sup>A</sup> | 0.51 <sup>B</sup> | 0.030 | <0.001              | <0.001 | 0.245 | 0.430 | 0.278 | 0.804 |

Means with different superscripts (a, b) between dietary treatments and (A, B) between sampling times differ significantly at  $P < 0.05$ .

<sup>a</sup>SEM: Standard error of the mean.

<sup>b</sup>Effect: The dietary treatment (D), the breed (B), the sampling time (S), and the interaction between dietary treatment x time (D x S) breed and sampling time (B x S) and dietary treatment, breed, and sampling time (D x B x S). CON: control dietary treatment; AC: dietary treatment supplemented with ActiSaf<sup>®</sup> and inorganic selenium; ACMAN: dietary treatment supplemented with ActiSaf<sup>®</sup>, Safmannan<sup>®</sup>, and SelSaf<sup>®</sup>.

**Table S6.** Milk yield, fat corrected milk yield (FCM<sub>6%</sub>), energy corrected milk yield (ECM), and milk chemical composition from ewes of the three dietary treatments (CON, AC, and ACMAN) throughout the experimental period (1<sup>st</sup>, 2<sup>nd</sup>, 3<sup>d</sup>, 4<sup>th</sup>, 5<sup>th</sup>, and 6<sup>th</sup> experimental week).

|                          | Dietary Treatment (D) |                    |                    |       | Sampling time (S)  |                     |                     |                     |                    |                     | Effect (D×S) |       |        |       |       |       |       |
|--------------------------|-----------------------|--------------------|--------------------|-------|--------------------|---------------------|---------------------|---------------------|--------------------|---------------------|--------------|-------|--------|-------|-------|-------|-------|
|                          | CON                   | AC                 | ACMAN              | SEM   | 1 <sup>st</sup>    | 2 <sup>nd</sup>     | 3 <sup>d</sup>      | 4 <sup>th</sup>     | 5 <sup>th</sup>    | 6 <sup>th</sup>     | SEM          | D     | S      | D×S   | B     | B×S   | B×S×D |
| Milk Yield, kg/d         | 2.19 <sup>b</sup>     | 2.83 <sup>a</sup>  | 2.84 <sup>a</sup>  | 0.050 | 2.40 <sup>C</sup>  | 2.62 <sup>B</sup>   | 2.53 <sup>BC</sup>  | 2.79 <sup>A</sup>   | 2.74 <sup>C</sup>  | 2.65 <sup>B</sup>   | 0.130        | 0.041 | <0.001 | 0.592 | 0.003 | 0.046 | 0.646 |
| FCM <sub>6%</sub> , kg/d | 2.39                  | 2.80               | 2.85               | 0.050 | 2.67 <sup>C</sup>  | 2.94 <sup>B</sup>   | 2.41 <sup>D</sup>   | 3.09 <sup>A</sup>   | 2.32 <sup>A</sup>  | 2.63 <sup>B</sup>   | 0.120        | 0.191 | <0.001 | 0.156 | 0.050 | 0.233 | 0.031 |
| ECM, kg/d                | 2.00                  | 2.42               | 2.45               | 0.040 | 2.22 <sup>BC</sup> | 2.44 <sup>B</sup>   | 2.10 <sup>C</sup>   | 2.58 <sup>A</sup>   | 2.12 <sup>C</sup>  | 2.28 <sup>B</sup>   | 0.100        | 0.116 | <0.001 | 0.288 | 0.027 | 0.091 | 0.127 |
| Fat, %                   | 6.76                  | 6.32               | 6.25               | 0.080 | 7.17 <sup>A</sup>  | 7.14 <sup>A</sup>   | 5.95 <sup>B</sup>   | 7.12 <sup>A</sup>   | 5.01 <sup>C</sup>  | 6.28 <sup>B</sup>   | 0.200        | 0.197 | <0.001 | 0.279 | 0.008 | 0.413 | 0.043 |
| Fat yield, g/d           | 147.8                 | 167.0              | 171.0              | 8.310 | 166.7 <sup>B</sup> | 184.0 <sup>A</sup>  | 141.5 <sup>C</sup>  | 192.8 <sup>A</sup>  | 129.1 <sup>D</sup> | 157.4 <sup>B</sup>  | 7.930        | 0.341 | <0.001 | 0.089 | 0.137 | 0.353 | 0.012 |
| Protein, %               | 4.96                  | 4.99               | 4.91               | 0.020 | 4.92 <sup>AB</sup> | 4.91 <sup>B</sup>   | 4.90 <sup>B</sup>   | 4.90 <sup>B</sup>   | 5.05 <sup>A</sup>  | 5.05 <sup>A</sup>   | 0.060        | 0.743 | 0.019  | 0.689 | 0.093 | 0.515 | 0.519 |
| Protein yield, g/d       | 108.3 <sup>t</sup>    | 140.9 <sup>t</sup> | 139.9              | 2.650 | 117.8 <sup>D</sup> | 129.0 <sup>BC</sup> | 123.9 <sup>CD</sup> | 136.6 <sup>A</sup>  | 137.9 <sup>A</sup> | 133.1 <sup>AB</sup> | 6.460        | 0.057 | <0.001 | 0.209 | 0.012 | 0.008 | 0.872 |
| Caseins, %               | 3.83                  | 3.86               | 3.84               | 0.020 | 3.81 <sup>AB</sup> | 3.80 <sup>B</sup>   | 3.80 <sup>B</sup>   | 3.80 <sup>B</sup>   | 3.92 <sup>A</sup>  | 3.92 <sup>A</sup>   | 0.050        | 0.949 | 0.021  | 0.658 | 0.081 | 0.579 | 0.707 |
| Caseins yield, g/d       | 84.4 <sup>t</sup>     | 109.4 <sup>t</sup> | 109.3 <sup>t</sup> | 2.080 | 91.7 <sup>C</sup>  | 100.1 <sup>B</sup>  | 96.6 <sup>BC</sup>  | 106.2 <sup>A</sup>  | 107.5 <sup>A</sup> | 104.0 <sup>AB</sup> | 5.080        | 0.050 | <0.001 | 0.221 | 0.011 | 0.021 | 0.785 |
| Lactose, %               | 4.93 <sup>a</sup>     | 5.10 <sup>b</sup>  | 5.04 <sup>a</sup>  | 0.010 | 4.90 <sup>D</sup>  | 4.98 <sup>CD</sup>  | 5.05 <sup>BC</sup>  | 5.02 <sup>BC</sup>  | 5.13 <sup>A</sup>  | 5.06 <sup>BC</sup>  | 0.030        | 0.014 | <0.001 | 0.279 | 0.011 | 0.285 | 0.734 |
| Lactose yield, g/d       | 108.5                 | 145.9              | 143.8              | 2.760 | 118.6 <sup>C</sup> | 131.1 <sup>B</sup>  | 129.2 <sup>B</sup>  | 140.7 <sup>A</sup>  | 141.4 <sup>A</sup> | 135.2 <sup>AB</sup> | 6.740        | 0.026 | <0.001 | 0.500 | 0.002 | 0.206 | 0.795 |
| Total solids, %          | 17.23                 | 16.78              | 16.91              | 0.100 | 18.04 <sup>A</sup> | 17.44 <sup>BC</sup> | 16.25 <sup>D</sup>  | 17.50 <sup>B</sup>  | 15.67 <sup>E</sup> | 16.95 <sup>C</sup>  | 0.220        | 0.517 | <0.001 | 0.151 | 0.858 | 0.243 | 0.067 |
| Solids not fat, %        | 10.52                 | 10.69              | 10.62              | 0.020 | 10.61 <sup>B</sup> | 10.47 <sup>C</sup>  | 10.53 <sup>BC</sup> | 10.53 <sup>BC</sup> | 10.78 <sup>A</sup> | 10.73 <sup>A</sup>  | 0.050        | 0.181 | <0.001 | 0.043 | 0.780 | 0.807 | 0.909 |

Means with different superscript (a, b) between dietary treatments and (A, B, C, D) between sampling times differ significantly at  $P < 0.05$ , and t is referred to values between 0.05 and 0.100 ( $0.05 < t < 0.100$ ).

FCM<sub>6%</sub> = Fat corrected milk in 6 % calculated by the equation  $FCM_{6\%} = (0.28 + 0.12 \times F) \times MY$ , where F = milk fat % and MY = milk yield in kg.

ECM = Energy corrected milk yield calculated by the equation  $ECM = \text{milk yield} \times (0.071 \times \text{Milk Fat (\%)} + 0.043 \times \text{Milk Protein (\%)} + 0.2224)$

<sup>a</sup>SEM: Standard error of the mean.

<sup>b</sup>Effect: The dietary treatment (D), the breed (B), the sampling time (S), and the interaction between dietary treatment x time (D x S) breed and sampling time (B x S) and dietary treatment, breed, and sampling time (D x B x S). CON: control dietary treatment; AC: dietary treatment supplemented with ActiSaf<sup>®</sup> and inorganic selenium; ACMAN: dietary treatment supplemented with ActiSaf<sup>®</sup>, Safmannan<sup>®</sup>, and SelSaf<sup>®</sup>.

**Table S7.** The relative transcript levels of genes in blood monocytes and neutrophils of ewes fed the three diets (CON, AC, ACMAN) at two sampling times (3<sup>rd</sup> and 6<sup>th</sup> week postpartum).

| Genes <sup>3</sup> | Dietary treatments (D) <sup>1</sup> |                      |                     |         | Sampling time (S)   |                     |         | Effect <sup>2</sup> |        |       |
|--------------------|-------------------------------------|----------------------|---------------------|---------|---------------------|---------------------|---------|---------------------|--------|-------|
|                    | CON                                 | AC                   | ACMAN               | SEM     | 3 <sup>rd</sup>     | 6 <sup>th</sup>     | SEM     | Diet                | Time   | D×S   |
| Monocytes          |                                     |                      |                     |         |                     |                     |         |                     |        |       |
| <i>CCL5</i>        | 0.42 <sup>ab</sup>                  | 0.68 <sup>a</sup>    | 0.31 <sup>b</sup>   | 0.04    | 0.37 <sup>B</sup>   | 0.56 <sup>A</sup>   | 0.06    | 0.007               | 0.001  | 0.358 |
| <i>CXCL16</i>      | 0.07                                | 0.07                 | 0.06                | 0.005   | 0.07                | 0.06                | 0.006   | 0.819               | 0.357  | 0.603 |
| <i>IL1B</i>        | 0.010 <sup>a</sup>                  | 0.002 <sup>b</sup>   | 0.008 <sup>ab</sup> | 0.001   | 0.007               | 0.006               | 0.001   | 0.004               | 0.767  | 0.941 |
| <i>IL2</i>         | 0.004                               | 0.002                | 0.003               | 0.0004  | 0.002               | 0.003               | 0.0007  | 0.216               | 0.096  | 0.851 |
| <i>IL6</i>         | 0.0006 <sup>a</sup>                 | 0.0004 <sup>ab</sup> | 0.0003 <sup>b</sup> | 0.00004 | 0.0004              | 0.0005              | 0.00006 | 0.026               | 0.142  | 0.702 |
| <i>IL8</i>         | 0.03                                | 0.04                 | 0.03                | 0.005   | 0.04                | 0.03                | 0.008   | 0.96                | 0.797  | 0.089 |
| <i>IL10</i>        | 0.02                                | 0.02                 | 0.02                | 0.002   | 0.02                | 0.02                | 0.003   | 0.915               | 0.718  | 0.081 |
| <i>IFNG</i>        | 0.02                                | 0.02                 | 0.02                | 0.002   | 0.02                | 0.02                | 0.003   | 0.409               | 0.111  | 0.021 |
| <i>TNFA</i>        | 0.08                                | 0.08                 | 0.08                | 0.007   | 0.09                | 0.08                | 0.01    | 0.873               | 0.213  | 0.463 |
| <i>NFKB</i>        | 0.41                                | 0.49 <sup>t</sup>    | 0.39 <sup>t</sup>   | 0.03    | 0.30 <sup>B</sup>   | 0.56 <sup>A</sup>   | 0.03    | 0.089               | <0.001 | 0.073 |
| Neutrophils        |                                     |                      |                     |         |                     |                     |         |                     |        |       |
| <i>CCL5</i>        | 1.51                                | 1.99 <sup>t</sup>    | 1.18 <sup>t</sup>   | 1.13    | 1.45                | 1.67                | 1.77    | 0.079               | 0.273  | 0.676 |
| <i>CXCL16</i>      | 0.08                                | 0.10                 | 0.09                | 0.004   | 0.08 <sup>B</sup>   | 0.10 <sup>A</sup>   | 0.006   | 0.478               | 0.003  | 0.502 |
| <i>IL1B</i>        | 0.023                               | 0.016                | 0.016               | 0.002   | 0.016               | 0.021               | 0.003   | 0.334               | 0.336  | 0.545 |
| <i>IL2</i>         | 0.005                               | 0.004                | 0.006               | 0.0005  | 0.004 <sup>B</sup>  | 0.005 <sup>A</sup>  | 0.0007  | 0.297               | 0.036  | 0.499 |
| <i>IL6</i>         | 0.0003                              | 0.0002               | 0.0003              | 0.00002 | 0.0003 <sup>A</sup> | 0.0002 <sup>B</sup> | 0.00003 | 0.672               | 0.009  | 0.432 |
| <i>IL8</i>         | 0.01                                | 0.01                 | 0.02                | 0.002   | 0.02 <sup>t</sup>   | 0.01 <sup>t</sup>   | 0.003   | 0.229               | 0.051  | 0.476 |
| <i>IL10</i>        | 0.02                                | 0.015                | 0.018               | 0.001   | 0.018               | 0.017               | 0.002   | 0.505               | 0.405  | 0.865 |
| <i>IFNG</i>        | 0.04                                | 0.05                 | 0.03                | 0.003   | 0.05 <sup>A</sup>   | 0.03 <sup>B</sup>   | 0.003   | 0.283               | <0.001 | 0.478 |
| <i>TNFA</i>        | 0.19                                | 0.23                 | 0.24                | 0.02    | 0.17 <sup>B</sup>   | 0.27 <sup>A</sup>   | 0.03    | 0.430               | 0.001  | 0.062 |
| <i>NFKB</i>        | 0.29 <sup>a</sup>                   | 0.30 <sup>a</sup>    | 0.21 <sup>b</sup>   | 0.02    | 0.23 <sup>B</sup>   | 0.31 <sup>A</sup>   | 0.02    | 0.020               | 0.007  | 0.201 |



<sup>1</sup>CON, control dietary treatment; AC, dietary treatment supplemented with ActiSaf<sup>®</sup> and inorganic selenium; ACMAN, dietary treatment supplemented with ActiSaf<sup>®</sup>, Safmannan<sup>®</sup>, and SelSaf<sup>®</sup>.

<sup>2</sup>Effect, the dietary treatments (D), the breed (B), the sampling time (S), and the interactions between the dietary treatments × time (D×S).

<sup>2</sup>CCL5, *C-X-C motif chemokine 5*; CXCL16, *C-X-C motif chemokine ligand 16*; INFG, *Interferon  $\gamma$* ; IL1B, *Interleukin-1 beta*; IL2, *Interleukin-2*; IL6, *Interleukin-6*; IL8, *Interleukin-8*; IL10, *Interleukin-10*; TNFA, *Tumor Necrosis Factor A*; NFkB, *Nuclear Factor kappa B*.

Means with different superscript letters (a, b) differ significantly at  $P < 0.05$ , and t is referred to values between 0.05 and 0.100 ( $0.05 < t < 0.100$ ).
